# Supplementary material for: A GIS-Based Simulation Method for Regional Food Potential and Demand
Source: MDPI journal article supplement (doi:10.3390/land10080880), 2021-08-21
Supplement: s1 [file s1]

Archive with 1 entries (1 files):
- land-1318908-supplementary.pdf
